# Supplementary material for: Preparation and characterization of magnetic nanocomposite catalysts with double Au nanoparticle layers
Source: Royal Society of Chemistry journal article supplement (doi:10.1039/c5ra18119d), 2015-01-01
Supplement: c5ra18119d1.pdf [file c5ra18119d1.pdf]

Supplementary Information

**Preparation and characterization of magnetic nanocomposite  
catalysts with double Au nanoparticle layers**

**Zia Ur Rahman<sup>a</sup>, Tingting Zhang<sup>a,b</sup>, Siwen Cui<sup>a,b</sup>, Daoai Wang<sup>\*a</sup>**

*<sup>a</sup>State Key Laboratory of Solid Lubrication, Lanzhou Institute of Chemical Physics, Chinese Academy of Sciences, Lanzhou 730000, China*

*<sup>b</sup>University of the Chinese Academy of Sciences, Beijing 100049, China*

---

\* Corresponding Authors:

E-mail: [wangda@licp.cas.cn](mailto:wangda@licp.cas.cn)

**Table S1** Kinetic constants ( $k$ ) and turnover frequencies (TOF) for the reduction of p-nitrophenol by nanocomposites

| Catalyst                                                                   | Au (wt%) | Ag (wt%) | $k$ (min <sup>-1</sup> ) | TOF (h <sup>-1</sup> ) |
|----------------------------------------------------------------------------|----------|----------|--------------------------|------------------------|
| Fe <sub>3</sub> O <sub>4</sub> @SiO <sub>2</sub> -Au                       | 11.80    | -        | 0.20                     | 18.75                  |
| Fe <sub>3</sub> O <sub>4</sub> @SiO <sub>2</sub> -Au@mSiO <sub>2</sub>     | 3.10     | -        | 0.10                     | 38.22                  |
| Fe <sub>3</sub> O <sub>4</sub> @SiO <sub>2</sub> -Au@mSiO <sub>2</sub> -Au | 15.30    | -        | 0.53                     | 33.71                  |
| Fe <sub>3</sub> O <sub>4</sub> @SiO <sub>2</sub> -Au@mSiO <sub>2</sub> -Ag | 3.40     | 4.10     | 0.95                     | 81.52                  |

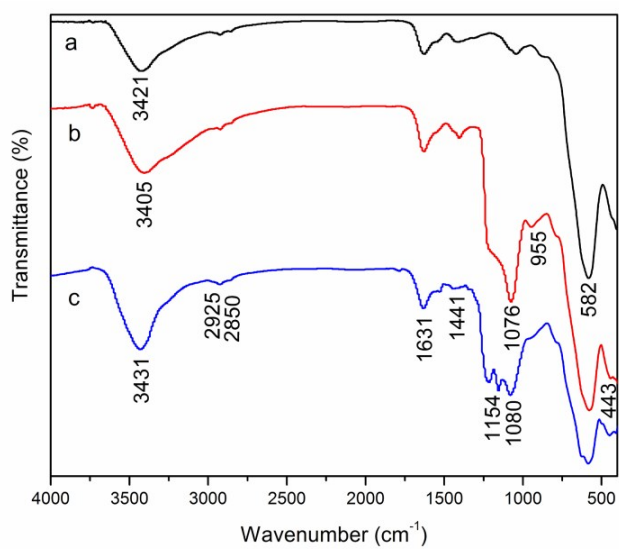

**Fig. S1** FT-IR spectra of (a) Fe<sub>3</sub>O<sub>4</sub>, (b) Fe<sub>3</sub>O<sub>4</sub>@SiO<sub>2</sub>, and (c) APTES-Fe<sub>3</sub>O<sub>4</sub>@SiO<sub>2</sub>

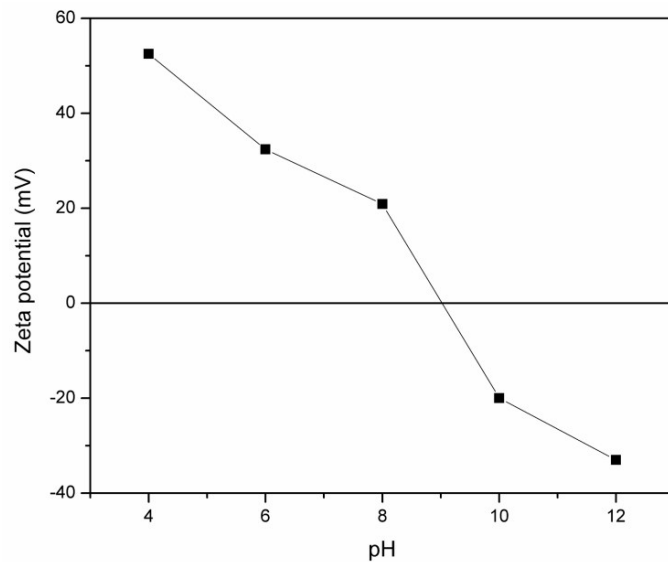

**Fig. S2** Zeta potential of  $\text{Fe}_3\text{O}_4@\text{SiO}_2\text{-NH}_2$  nanoparticles at different pH values indicating the presence of amine groups resulting positively charged nanoparticles.

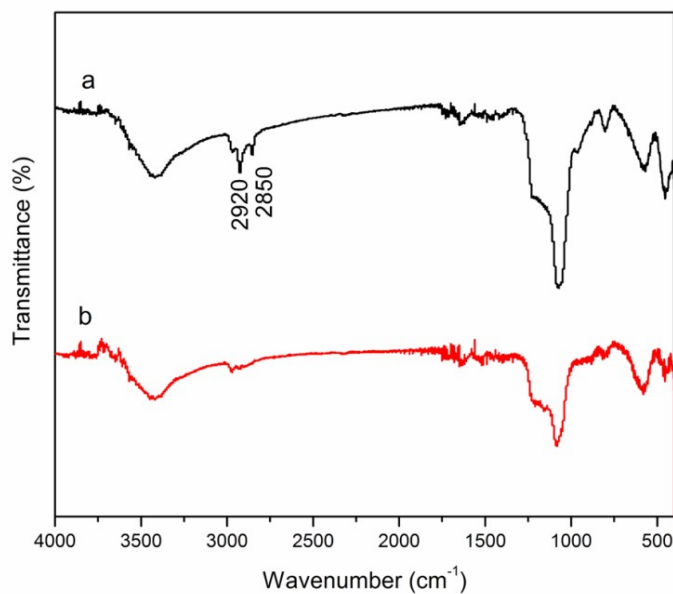

**Fig. S3** FT-IR spectra of (a) nanocomposites before CTAB extraction and (b) after CTAB extraction by refluxing with acetone.

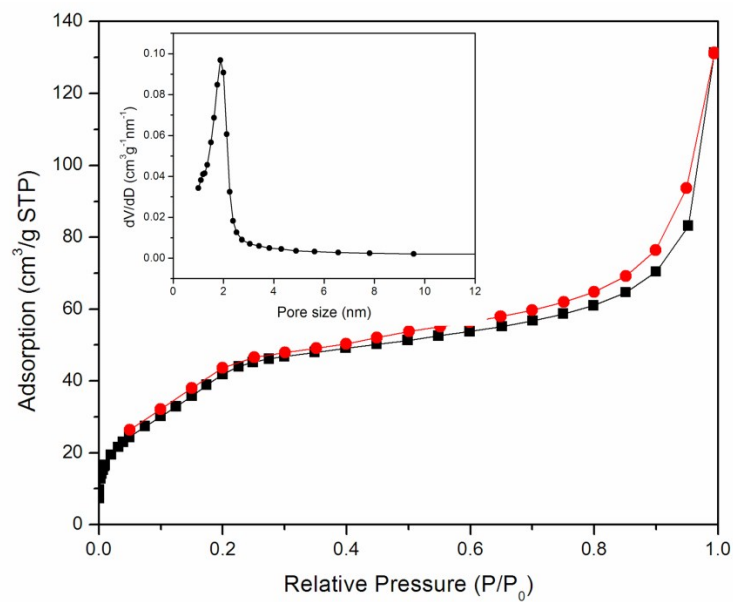

**Fig. S4** N<sub>2</sub> adsorption-desorption isotherms and pore size distribution (inset) of Fe<sub>3</sub>O<sub>4</sub>@SiO<sub>2</sub>-Au@mSiO<sub>2</sub> after CTAB extraction.

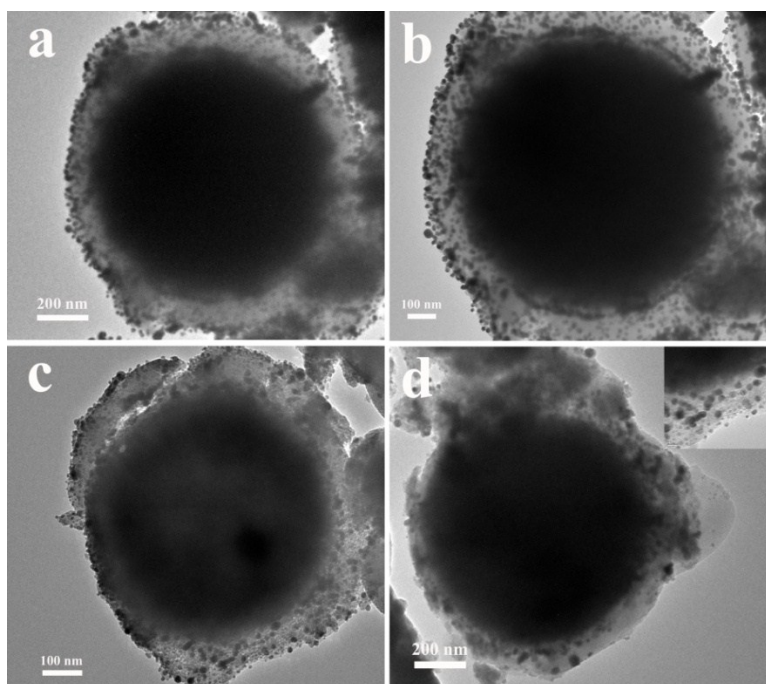

**Fig. S5** TEM of (a, b) Fe<sub>3</sub>O<sub>4</sub>@SiO<sub>2</sub>-Au@mSiO<sub>2</sub>-Au and (c, d) Fe<sub>3</sub>O<sub>4</sub>@SiO<sub>2</sub>-Au@mSiO<sub>2</sub>-Ag. Inset of d shows Ag nanoparticles on the outer silica surface.

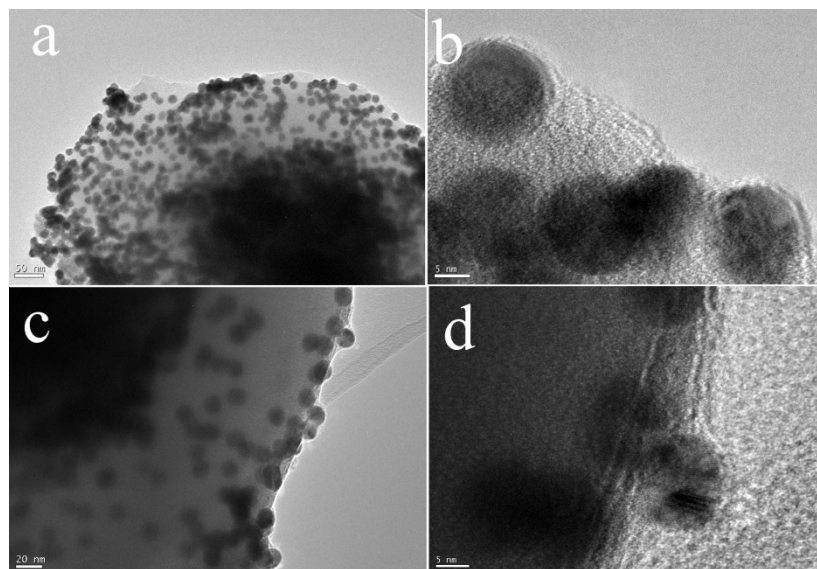

**Fig. S6** HRTEM of (a, b)  $\text{Fe}_3\text{O}_4@\text{SiO}_2\text{-Au@mSiO}_2\text{-Au}$  and (c, d)  $\text{Fe}_3\text{O}_4@\text{SiO}_2\text{-Au@mSiO}_2\text{-Ag}$ .

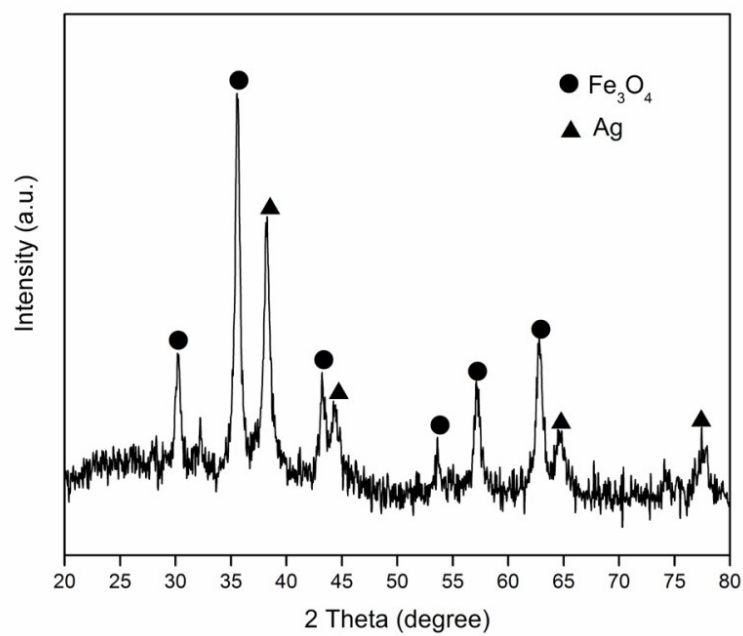

**Fig. S7** The wide angle XRD patterns of  $\text{Fe}_3\text{O}_4@\text{SiO}_2\text{-Au@mSiO}_2\text{-Ag}$



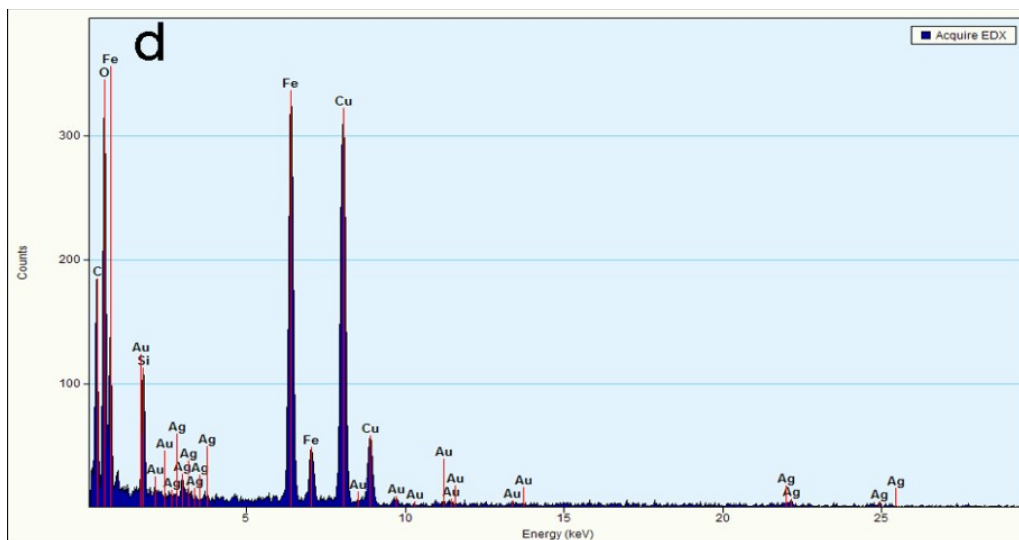

**Fig. S8** EDX spectra of (a)  $\text{Fe}_3\text{O}_4@\text{SiO}_2\text{-Au}$ , (b)  $\text{Fe}_3\text{O}_4@\text{SiO}_2\text{-Au@mSiO}_2$ , (c)  $\text{Fe}_3\text{O}_4@\text{SiO}_2\text{-Au@mSiO}_2\text{-Au}$ , and (d)  $\text{Fe}_3\text{O}_4@\text{SiO}_2\text{-Au@mSiO}_2\text{-Ag}$  indicating the presence of elements in the nanocomposites.

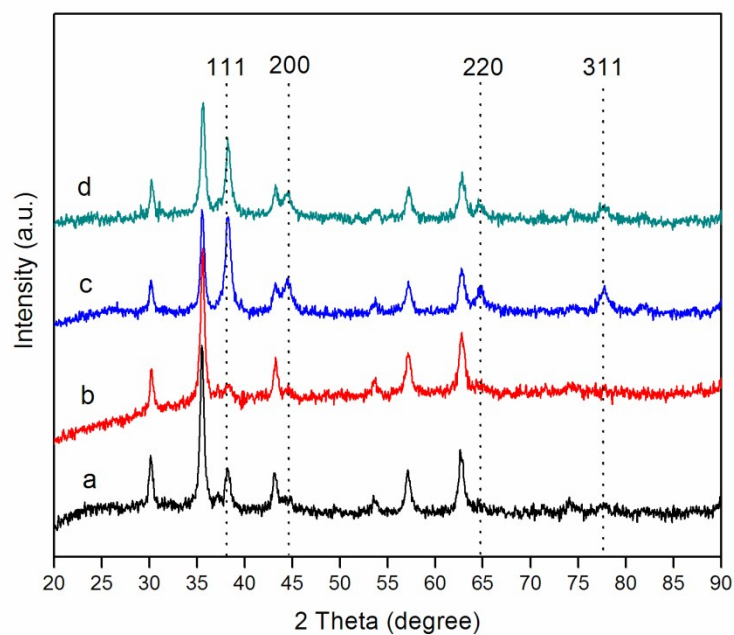

**Fig. S9** The wide angle XRD patterns of (a)  $\text{Fe}_3\text{O}_4@\text{SiO}_2\text{-Au}$ , (b)  $\text{Fe}_3\text{O}_4@\text{SiO}_2\text{-Au@mSiO}_2$ , (c)  $\text{Fe}_3\text{O}_4@\text{SiO}_2\text{-Au@mSiO}_2\text{-Au}$ , and (d)  $\text{Fe}_3\text{O}_4@\text{SiO}_2\text{-Au@mSiO}_2\text{-Ag}$  after using for 6 cycles.
